# Supplementary material for: Revealing Seasonal Dietary Niche Overlap Among Sympatric Large Carnivores using DNA Metabarcoding
Source: Research Square preprint supplement (doi:10.21203/rs.3.rs-7990153/v1), 2025-11-26
Supplement: Supplementary file 2 [file 9f1fd059b412c116d92657c9.pdf]

# **Revealing Seasonal Dietary Niche Overlap Among Sympatric Large Carnivores using DNA Metabarcoding**

## **Biodiversity and Conservation**

Jessica R. Patterson<sup>1</sup>, Stéphanie Périquet-Pearce<sup>2,3,4</sup>, Madeline Melton<sup>1</sup>, Brennan PetersonWood<sup>1</sup>,  
Rubén Portas<sup>5</sup>, Ortwin Aschenborn<sup>5</sup>, Claudine Cloete<sup>6</sup>, Laura E. Peirson<sup>7</sup>, Diana J.R. Lafferty<sup>7</sup>,  
James C. Beasley<sup>1</sup>

<sup>1</sup>University of Georgia, Warnell School of Forestry and Natural Resources, Savannah River Ecology Lab, P.O. Box Drawer E, Aiken, SC 29802, USA

<sup>2</sup>Ongava Research Centre, Private Bag 13 419, Southern Industrial, Windhoek, Namibia

<sup>3</sup>Department of Conservation Management, Faculty of Science, George Campus, Nelson Mandela University, Madiba Drive, George, 6530, South Africa

<sup>4</sup>Panthera, New York, NY, USA

<sup>5</sup>Department of Evolutionary Ecology Leibniz Institute for Zoo and Wildlife Research of Berlin, Alfred-Kowalke St. 17, 10315 Berlin

<sup>6</sup>Etosha Ecological Institute, Etosha National Park, Namibia.

<sup>7</sup>Northern Michigan University, Department of Biology, Wildlife Ecology and Conservation Science Laboratory, Marquette, MI 49855, USA.

Corresponding author:

Jessica R. Patterson

University of Georgia, Warnell School of Forestry and Natural Resources, Savannah River Ecology Lab, P.O. Box Drawer E, Aiken, SC 29802, USA

[jessypatterson311@gmail.com](mailto:jessypatterson311@gmail.com)

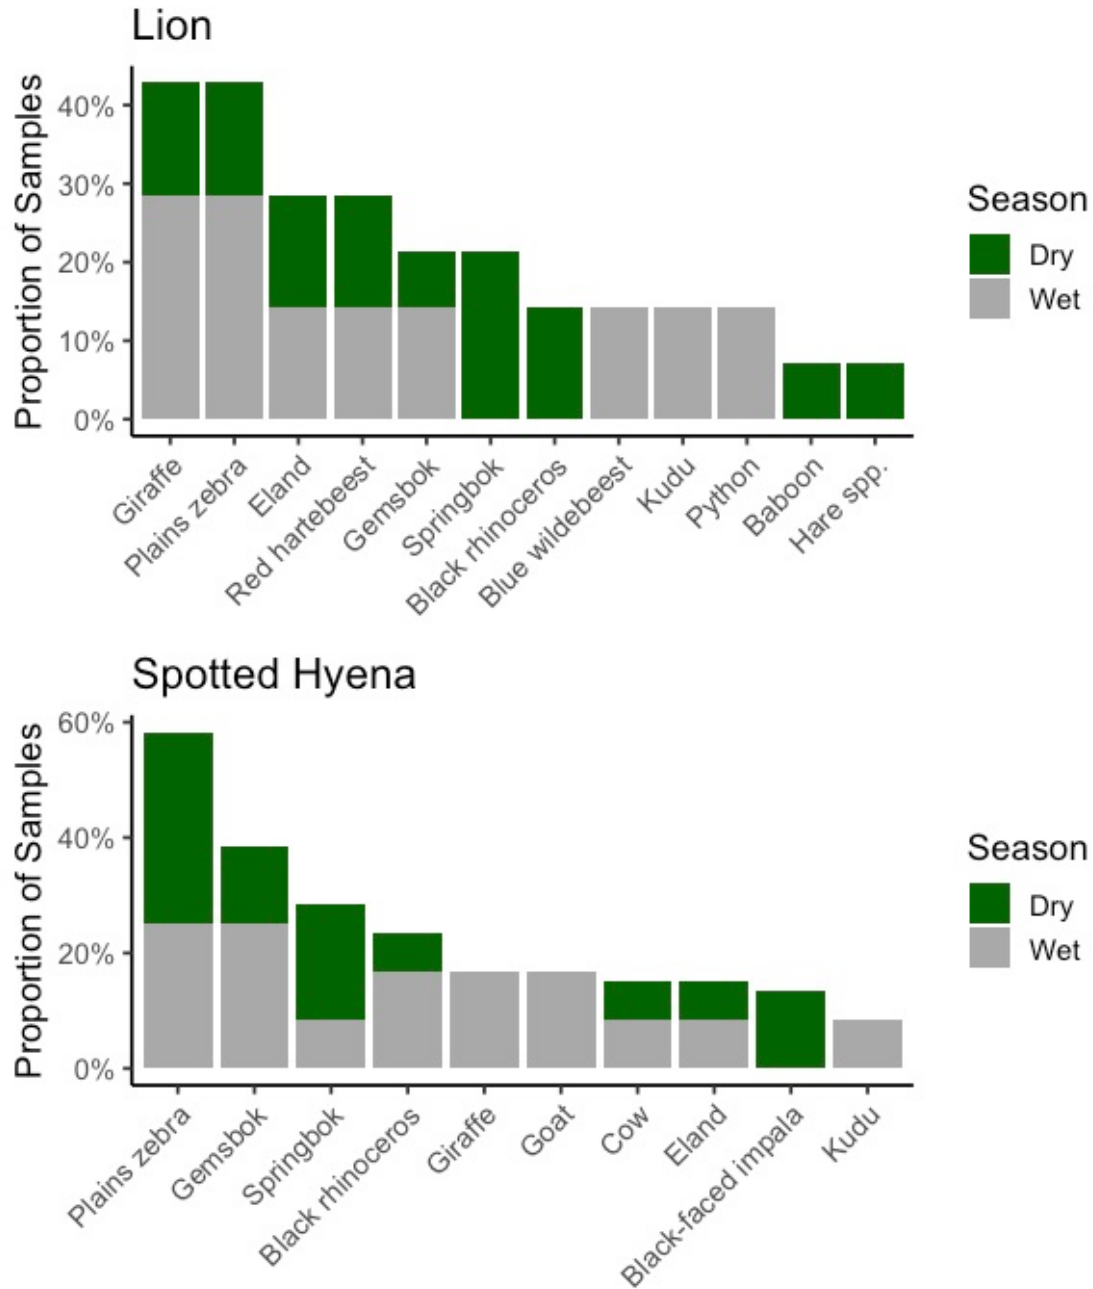

**Fig. S1** Seasonal composition of vertebrate prey species detected in the diets of African lions (*Panthera leo*) and spotted hyenas (*Crocuta crocuta*) in Etosha National Park based on DNA metabarcoding. Bars represent the proportion of fecal samples in which each prey species was detected, calculated as the number of unique samples per species and season divided by the total

number of samples for that carnivore and season. Results are shown separately for the dry season (green) and wet season (grey), and prey species are ordered by overall frequency of occurrence from left to right. Only prey species with  $\geq 1\%$  relative read abundance were included

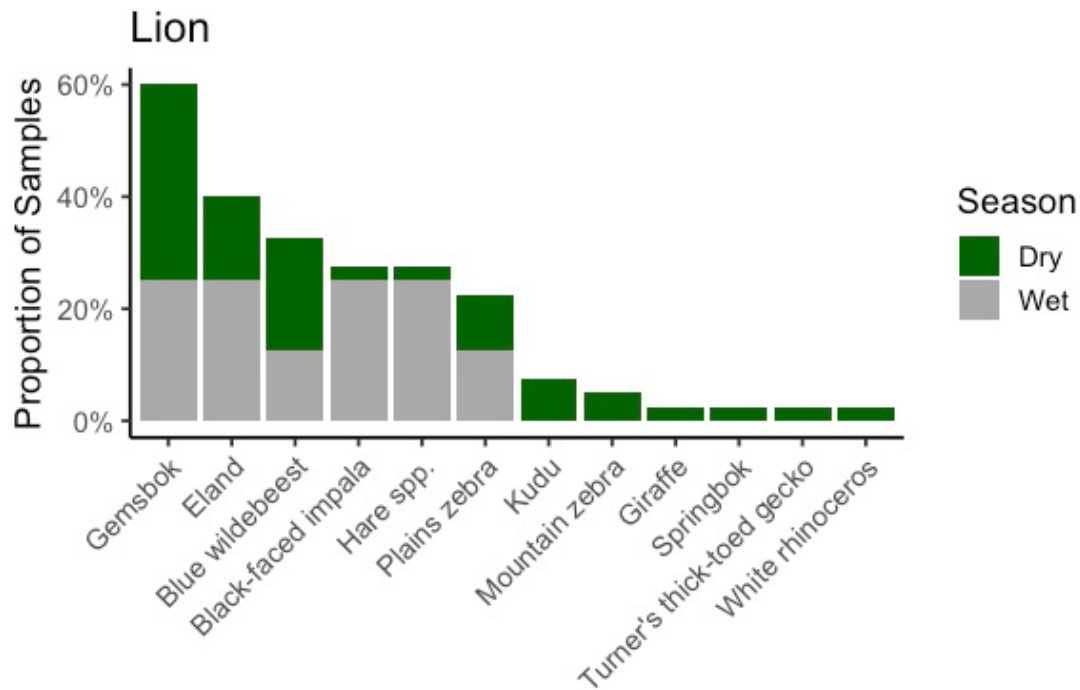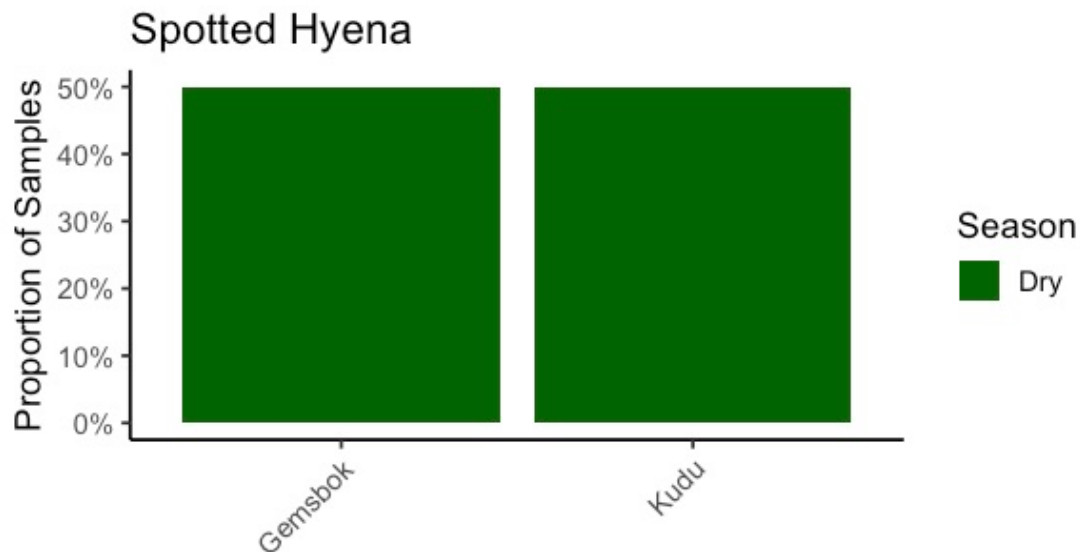

**Fig. S2** Seasonal composition of vertebrate prey species detected in the diets of African lions (*Panthera leo*) and spotted hyenas (*Crocuta crocuta*) in the Ongava Game Reserve based on DNA metabarcoding. Bars represent the proportion of fecal samples in which each prey species was detected, calculated as the number of unique samples per species and season divided by the total number of samples for that carnivore and season. Results are shown separately for the dry season (green) and wet season (grey), and prey species are ordered by overall frequency of occurrence from left to right. Only prey species with  $\geq 1\%$  relative read abundance were included

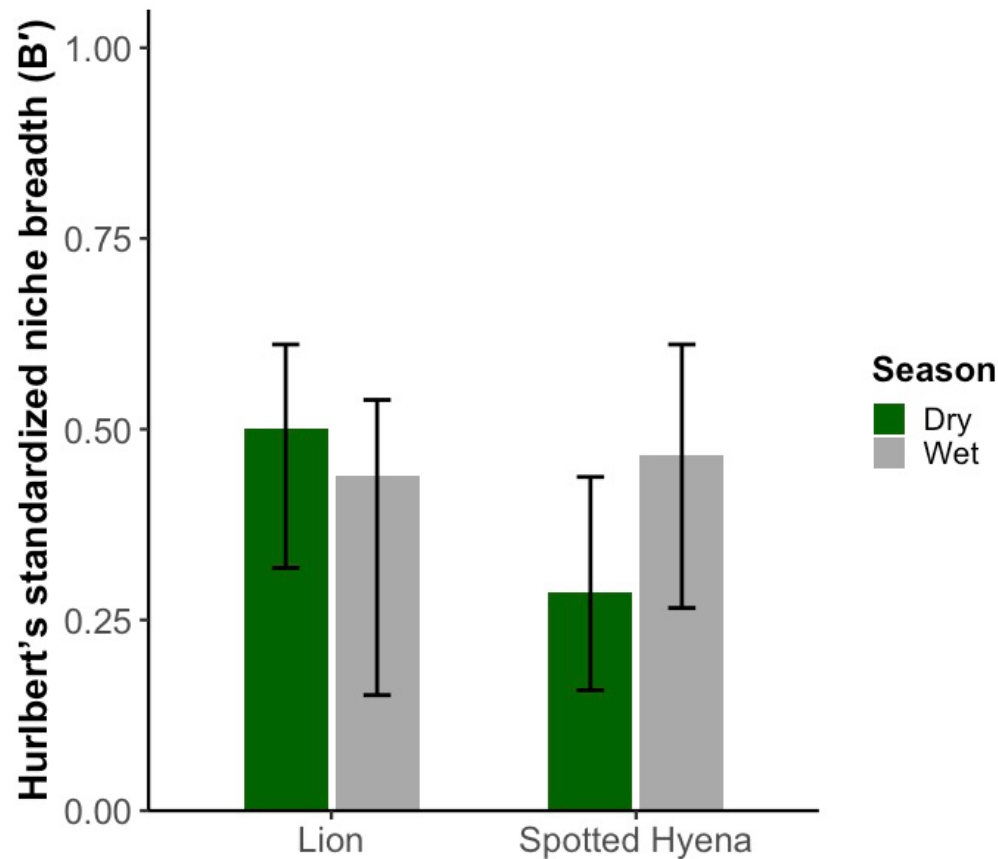

**Fig. S3** Seasonal variation in standardized niche breadth (Hurlbert's B') for African lions (*Panthera leo*) and spotted hyenas (*Crocuta crocuta*) in Etosha National Park, in both the dry

(May-October) and wet (November-April) seasons. Bars represent mean dietary breadth based on frequency of occurrence (FOO) of prey species in fecal samples, with error bars showing 95% confidence intervals from 2,000 bootstrap iterations

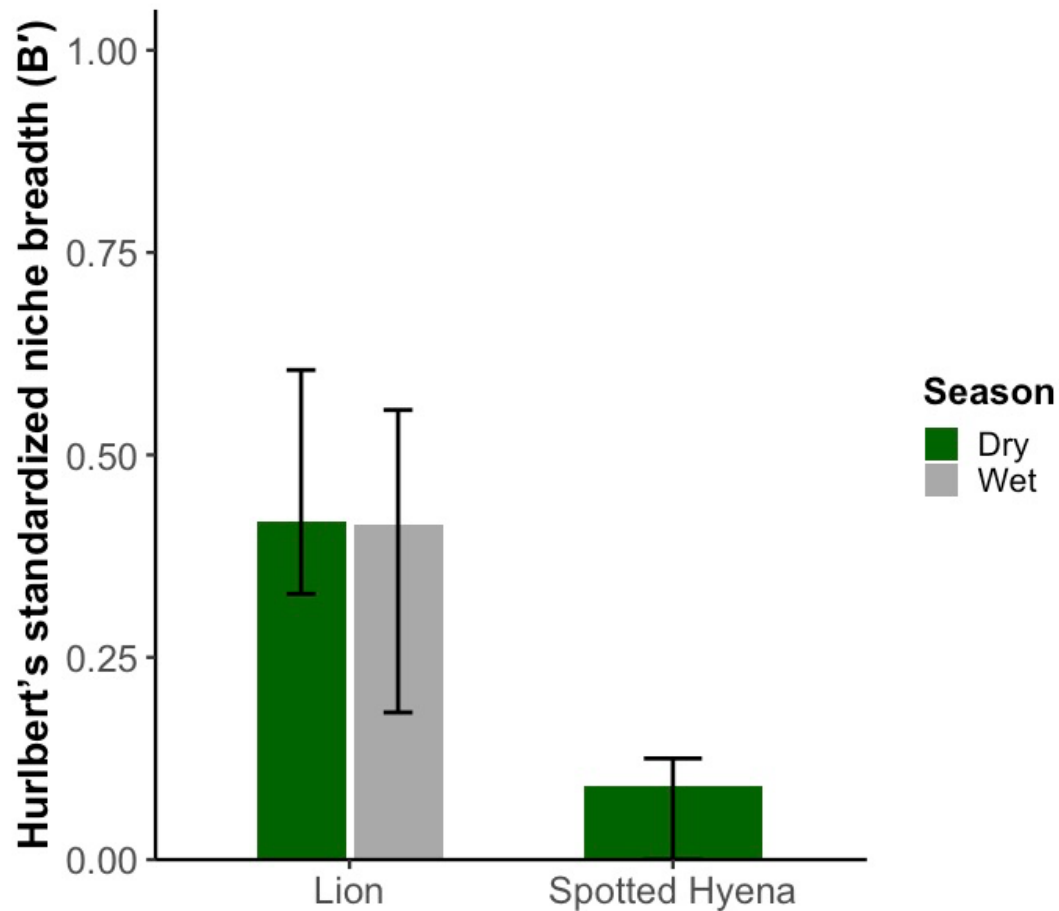

**Fig. S4** Seasonal variation in standardized niche breadth (Hurlbert's B') for African lions (*Panthera leo*) and spotted hyenas (*Crocuta crocuta*) in the Ongava Game Reserve, in both the dry (May-October) and wet (November-April) seasons. Bars represent mean dietary breadth based on frequency of occurrence (FOO) of prey species in fecal samples, with error bars showing 95% confidence intervals from 2,000 bootstrap iterations
